# Supplementary material
Source: Springer Nature journal article supplement (https://www.springermedizin.de/resource/supplementary/12936_2007_364_MOESM3_ESM.pdf/9547646)

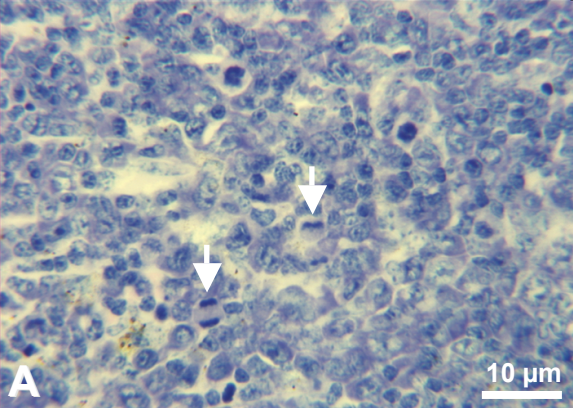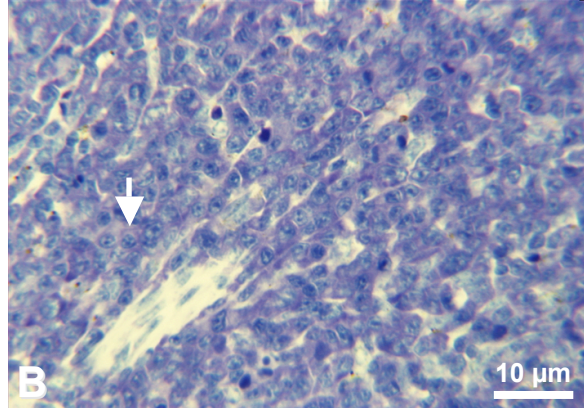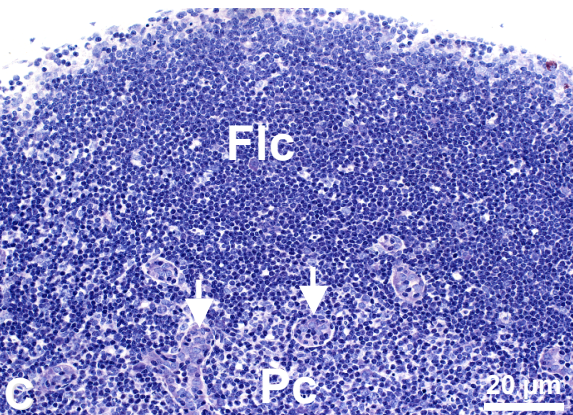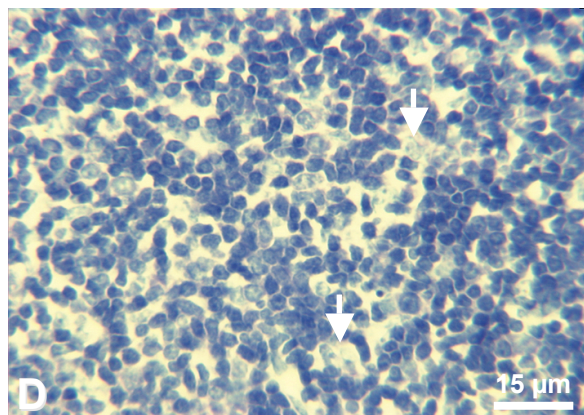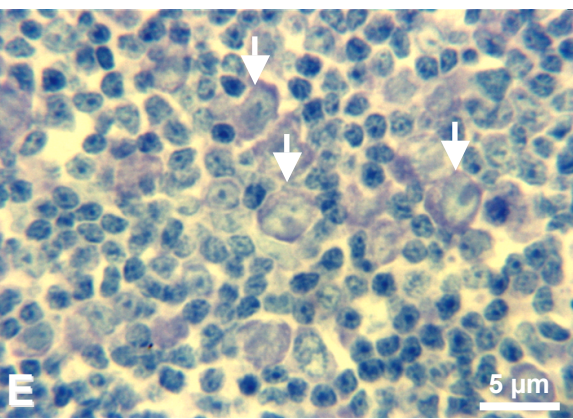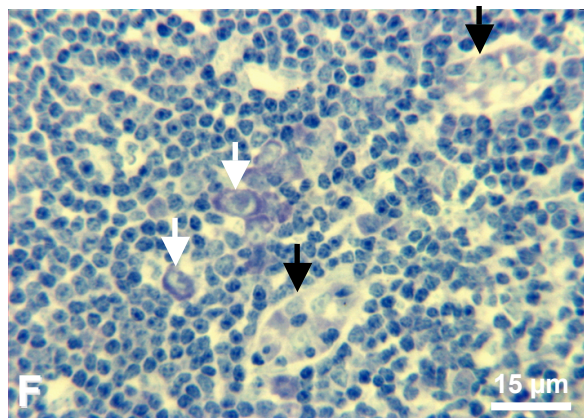

Supplement: MOESM3 [file 9547646]
